# Supplementary material for: Myofiber branching rather than myofiber hyperplasia contributes to muscle hypertrophy in mdx mice
Source: PubMed Central journal article supplement (PMC4047439; doi:10.1186/2044-5040-4-10), 2014-05-23

A

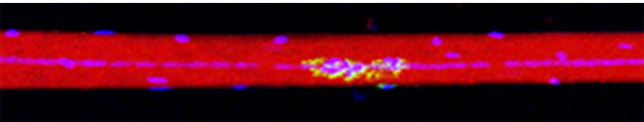

B

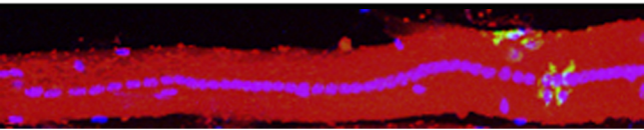

Supplement: 2044-5040-4-10-S3.pdf [file 2044-5040-4-10-S3.pdf]
